# Supplementary material for: Exploring the Potential of the Model Cyanobacteria Synecho-Coccus PCC 7002 and PCC 7942 for the Photoproduction of High-Value Terpenes: Comparison With Synechocystis PCC 6803
Source: Preprints.org preprint supplement (doi:10.20944/preprints202302.0194.v1), 2023-02-13
Supplement: Supplementary file 1 [file supplementary]

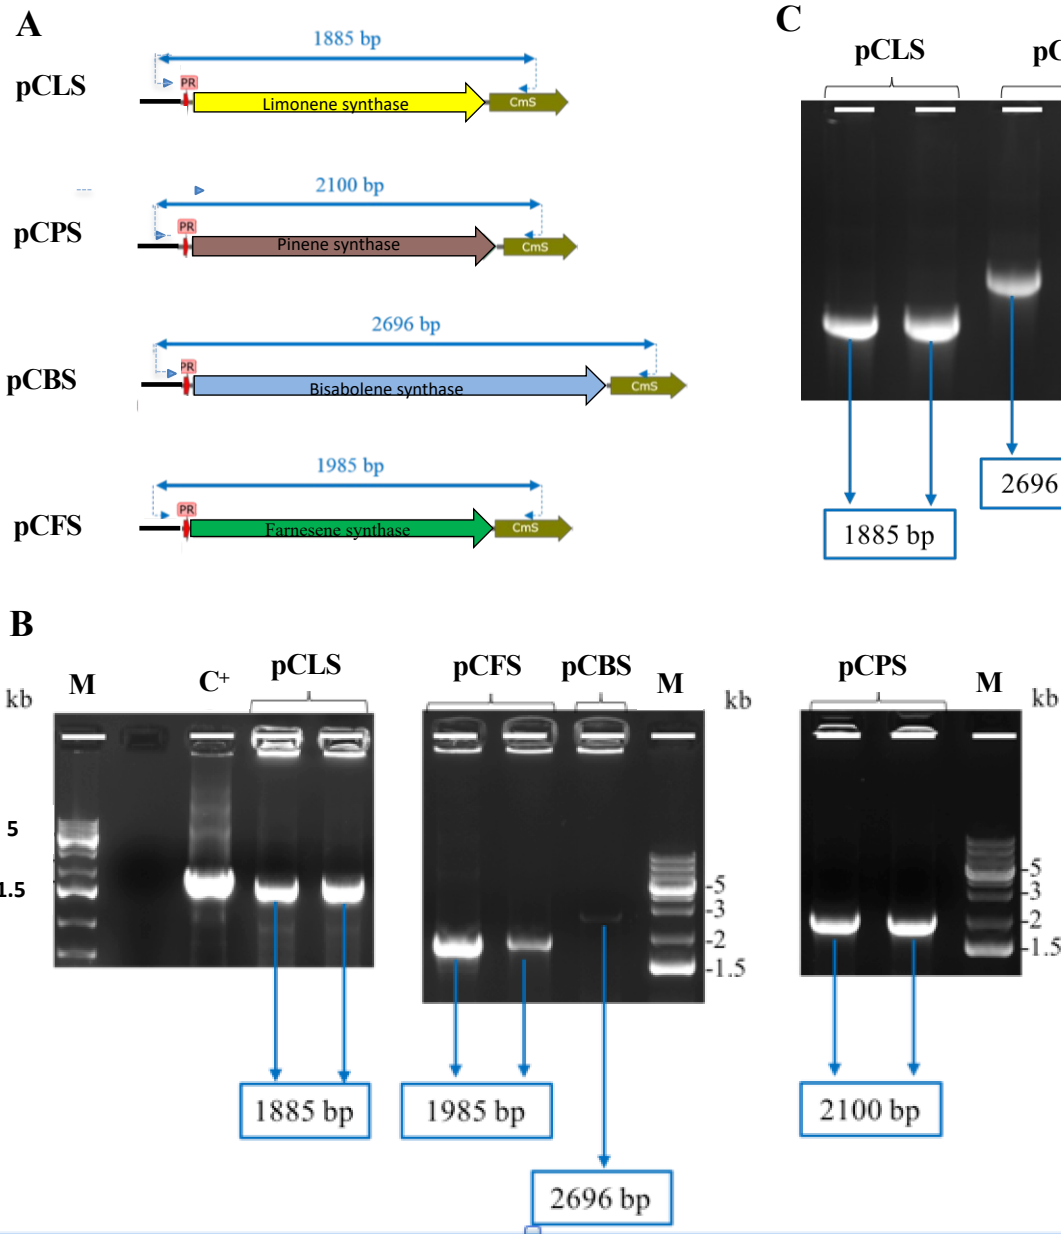

**Figure S1. PCR verification of the structure of the pC plasmid family replicating in *Synechococcus* PCC 7002 and *Synechococcus* PCC 7942**

(A) Schematic representation of the relevant region of pC derivatives expressing terpene synthase (ts) genes (large arrows) from the strong lambda-phage pR promoter (small red triangles). PCR primers and resulting DNA products are indicated by blue triangles and double arrows, respectively.

Typical UV-light image of the corresponding agarose gels used to analyze two clones of *Synechococcus* PCC 7002 (B) or *Synechococcus* PCC 7942 (C) harboring pCBS, pCFS, pCLS or pCPS. Size marker (M) = Genruler 1 kb Plus DNA Ladder (Thermofisher).

**A**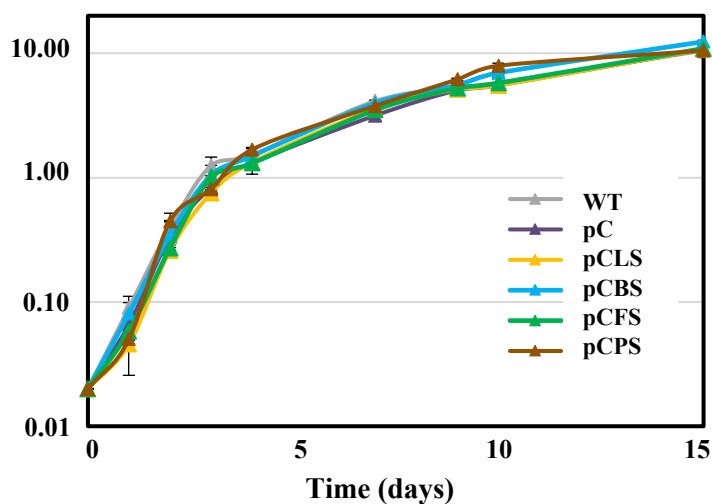**B**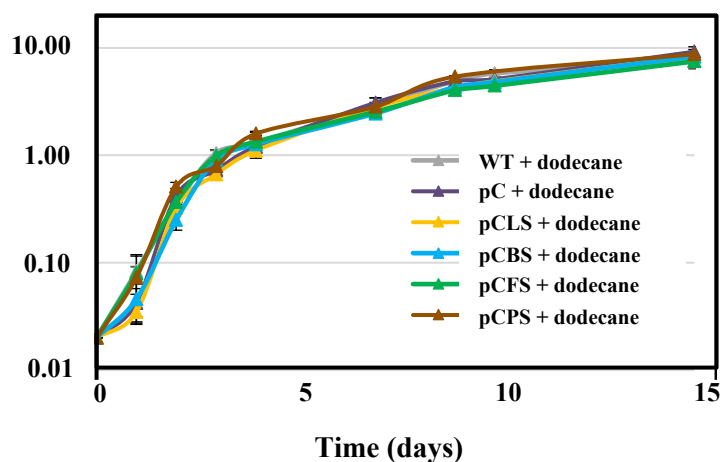

**Figure S2. Influence of dodecane and pC-derived plasmids on the photoautotrophic growth of *Synechococcus* PCC 7002**

All strains were cultivated under standard light (2500 lux) and temperature (30°C) in absence (A) or presence (B) of a dodecane overlay: wild-type (WT), or its derivatives carrying the **empty pC vector**, or a pC-derived plasmid expressing the limonene synthase (**pCLS**), bisabolene synthase (**pCBS**), farnesene synthase (**pCFS**) or pinene synthase (**pCPS**). Errors bars represent standard deviation from biological triplicates.

**Figure S3A. GC–MS analyses of the dodecane overlays of cultures of the *Synechococcus* PCC 7002 strains harboring the plasmids pC, pCBS or pCFS**

Ion chromatograms (left panels) and corresponding mass spectra (right panels) of farnesene-isomers standards containing bisabolene (a) or dodecane samples from cultures of *Synechococcus* PCC 7002 propagating pCFS (b, production of  $\alpha$ -farnesene), pCBS (c, E- $\alpha$ -bisabolene production) or pC (d, negative control).  $\beta$ -caryophyllene (retention time = 17.3 min) was used as the fixed-concentration (0.01 g/L) internal standard (IS) for quantification. The concentrations of bisabolene and farnesene were calculated using the standard curves that we have reported during our recent analysis of the production of bisabolene and farnesene by the other model cyanobacterium *Synechocystis* PCC 6803 (See Blanc-Garin *et al* 2022 Biotechnology for Biofuels and Bioproducts 15 <https://doi.org/10.1186/s13068-022-02211-0>).

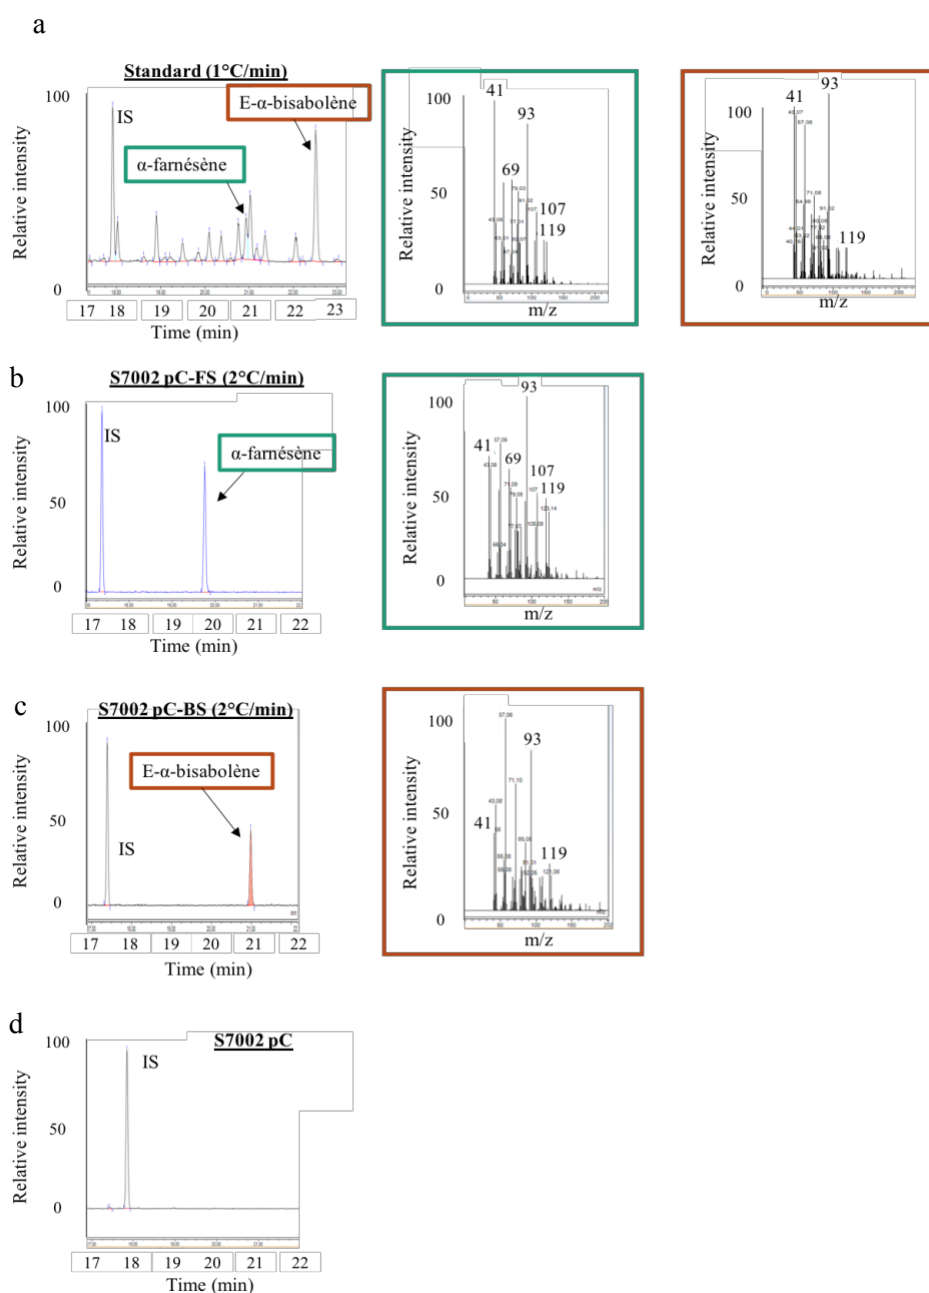

**Figure S3B. GC–MS analyses of the dodecane overlay of cultures of the *Synechococcus* PCC 7002 strains harboring the plasmids pC or pCLS**

Ion chromatograms (left panels) and corresponding mass spectra (right panels) of a S-(-)-limonene standard (upper panel) or dodecane samples (lower panel) of cultures of *Synechocystis* harboring either pC (negative control) or the pCLS (S-(-)-limonene production). Pinene (retention time =5.41) was used as the fixed-concentration (0.01 g/L) internal standard (IS) for quantification. The concentration of limonene was calculated using the standard curves that we employed during our recent analysis of limonene production by the other model cyanobacterium *Synechocystis* PCC 6803 (See Blanc-Garin *et al* 2022 Biotechnology for Biofuels and Bioproducts 15 <https://doi.org/10.1186/s13068-022-02211-0>).

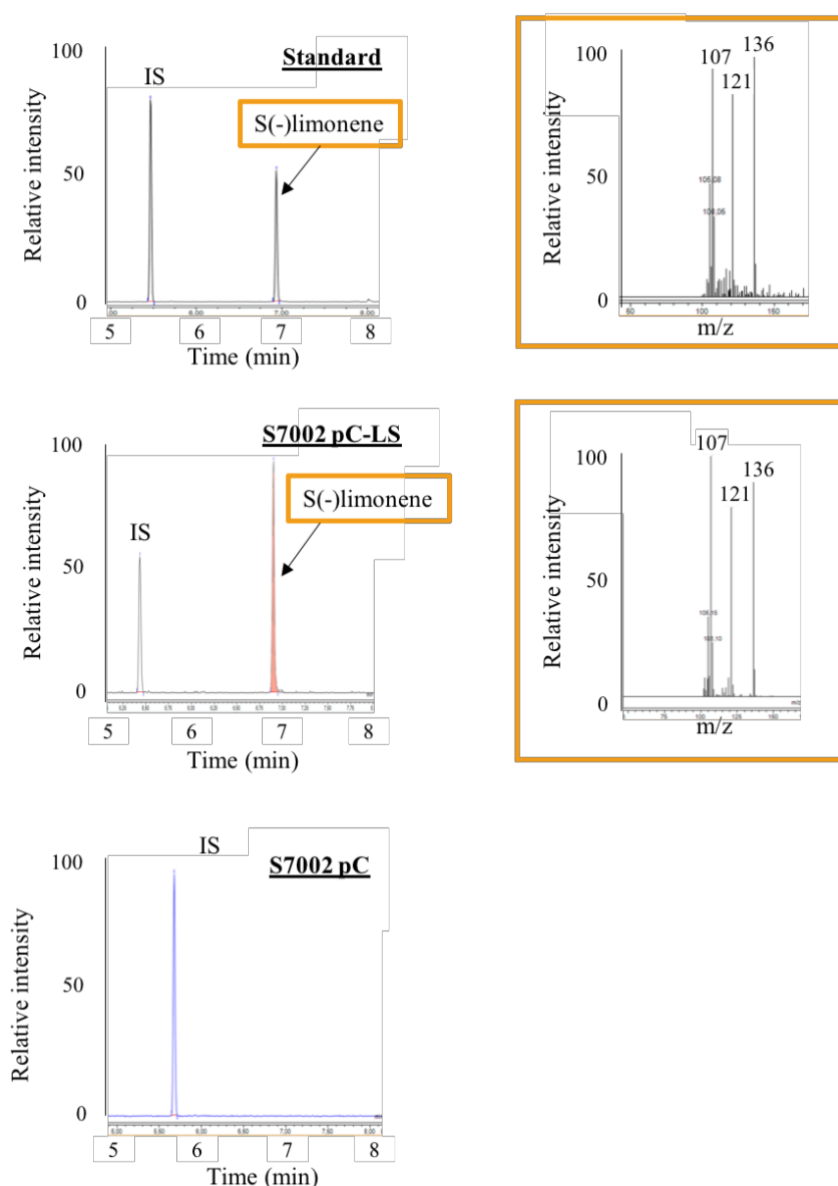

**Figure S3C. GC–MS analyses of the dodecane overlay of cultures of the *Synechococcus* PCC 7002 strains harboring the pC or pCPS plasmids**

Ion chromatograms (left panels) and corresponding mass spectra (right panels) of an  $\alpha$ -pinene standard (upper panel) or dodecane samples (lower panel) of cultures of *Synechococcus* PCC 7002 harboring either pC (negative control) or the pCPS (pinene production). S-(-)-limonene (retention time = 6.89 min) was used as the fixed-concentration (0.01 g/L) internal standard (IS) for quantification. The concentration of pinene was calculated using the standard curves that we employed during our recent analysis of pinene production by *Synechocystis* PCC 6803 (See Blanc-Garin *et al* 2022 *Biotechnology for Biofuels and Bioproducts* 15 <https://doi.org/10.1186/s13068-022-02211-0>).

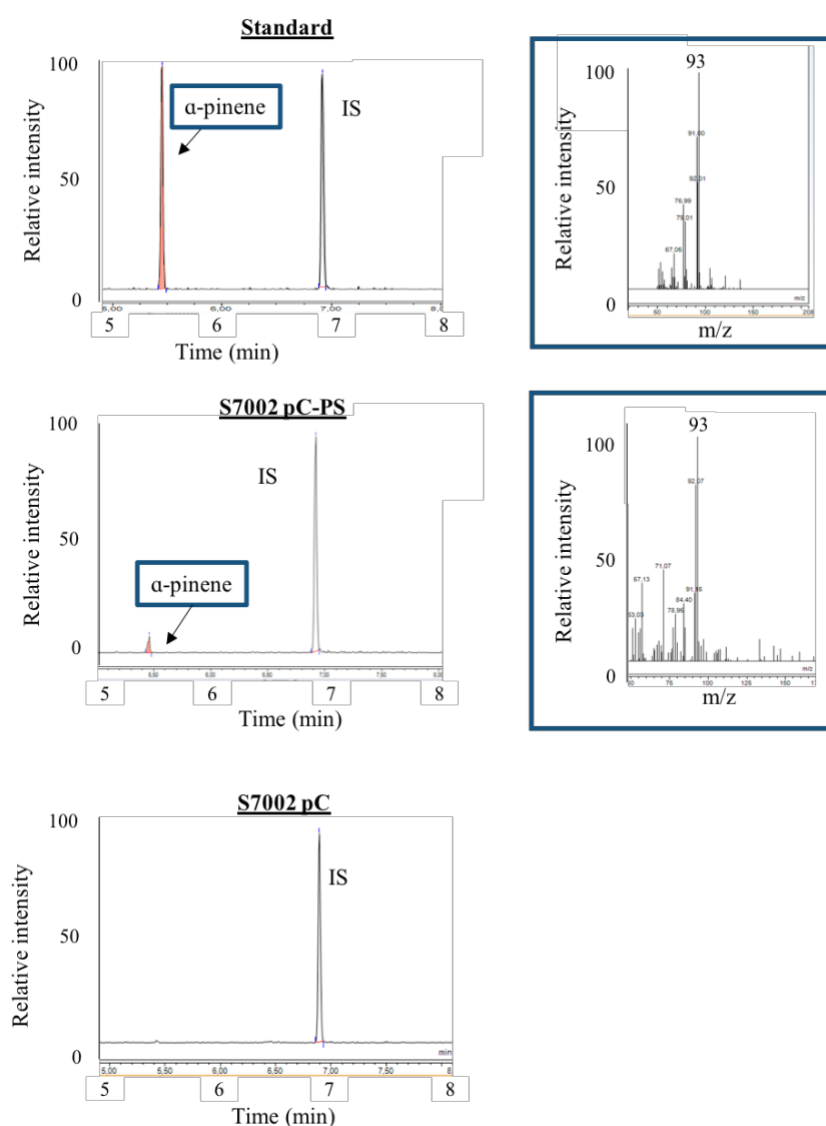

**Figure S4A GC–MS analyses of the dodecane overlays of cultures of the *Synechococcus* PCC 7942 strains harboring the plasmids pC, pCBS or pCFS**

Ion chromatograms (left panels) and corresponding mass spectra (right panels) of farnesene-isomers standard containing bisabolene (a) or dodecane samples from cultures of *Synechococcus* PCC 7942 propagating pCFS (b, production of  $\alpha$ -farnesene), pCBS (c, E- $\alpha$ -bisabolene production) or pC (d, negative control).  $\beta$ -caryophyllene (retention time = 17.3 min) was used as the fixed-concentration (0.01 g/L) internal standard (IS) for quantification. The concentrations of bisabolene and farnesene were calculated using the standard curves that we have reported during our recent analysis of the production of bisabolene and farnesene by the other model cyanobacterium *Synechocystis* PCC 6803 (See Blanc-Garin *et al* 2022 Biotechnology for Biofuels and Bioproducts 15 <https://doi.org/10.1186/s13068-022-02211-0>).

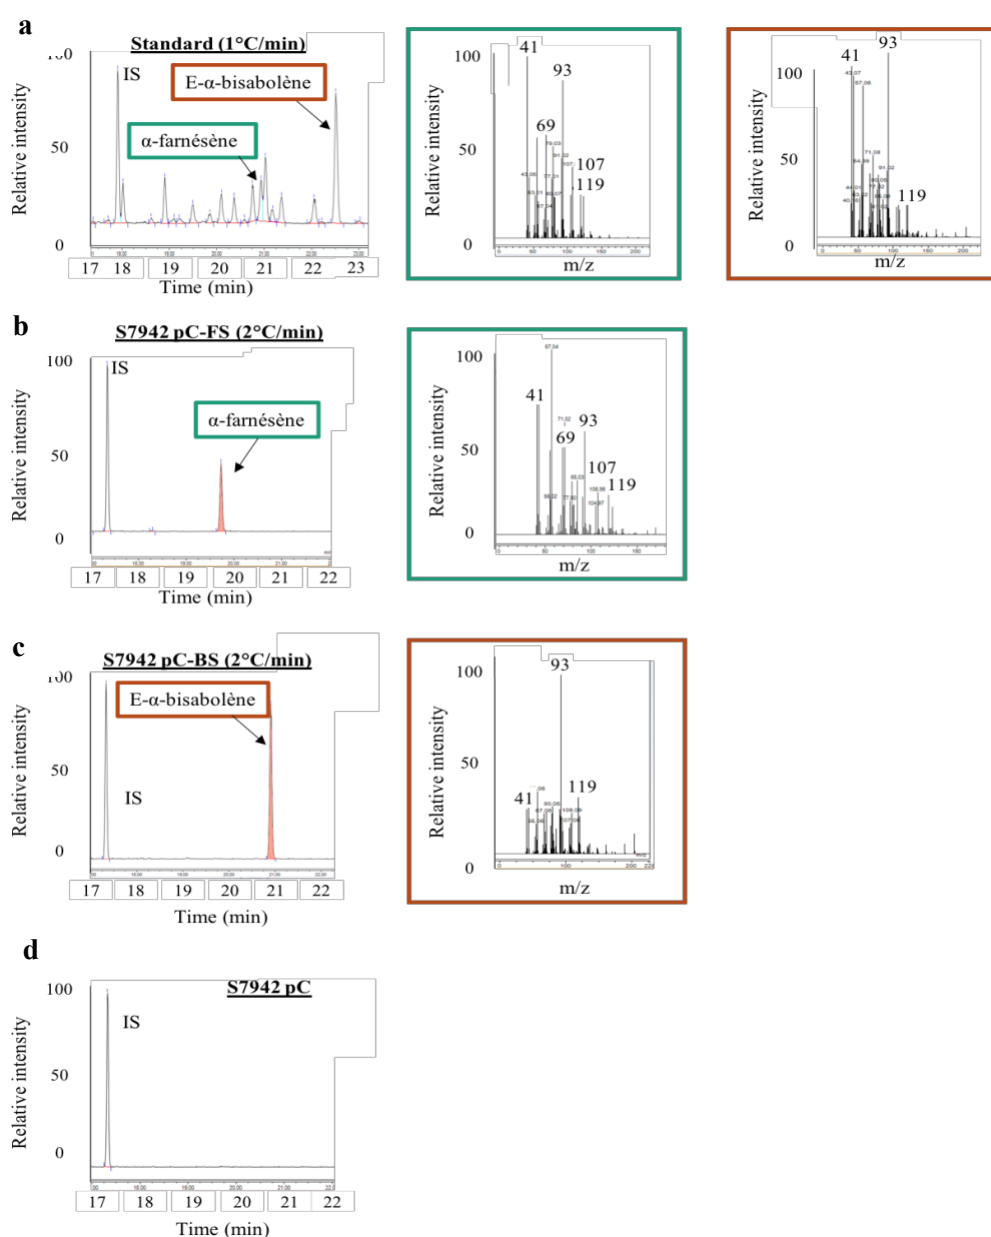

**Figure S4B. GC–MS analyses of the dodecane overlay of cultures of the *Synechococcus* PCC 7942 strains harboring the pC or pCLS plasmids**

Ion chromatograms (left panels) and corresponding mass spectra (right panels) of a S(-)-limonene standard (upper panel) or dodecane samples (lower panel) of cultures of *Synechococcus* PCC 7942 harboring either pC (negative control) or the pCLS (S(-)-limonene production). Pinene (retention time =5.44) was used as the fixed-concentration (0.01 g/L) internal standard (IS) for quantification. The concentration of limonene was calculated using the standard curves that we employed during our recent analysis of limonene production by the other model cyanobacterium *Synechocystis* PCC 6803 (See Blanc-Garin *et al* 2022 Biotechnology for Biofuels and Bioproducts 15 <https://doi.org/10.1186/s13068-022-02211-0>).

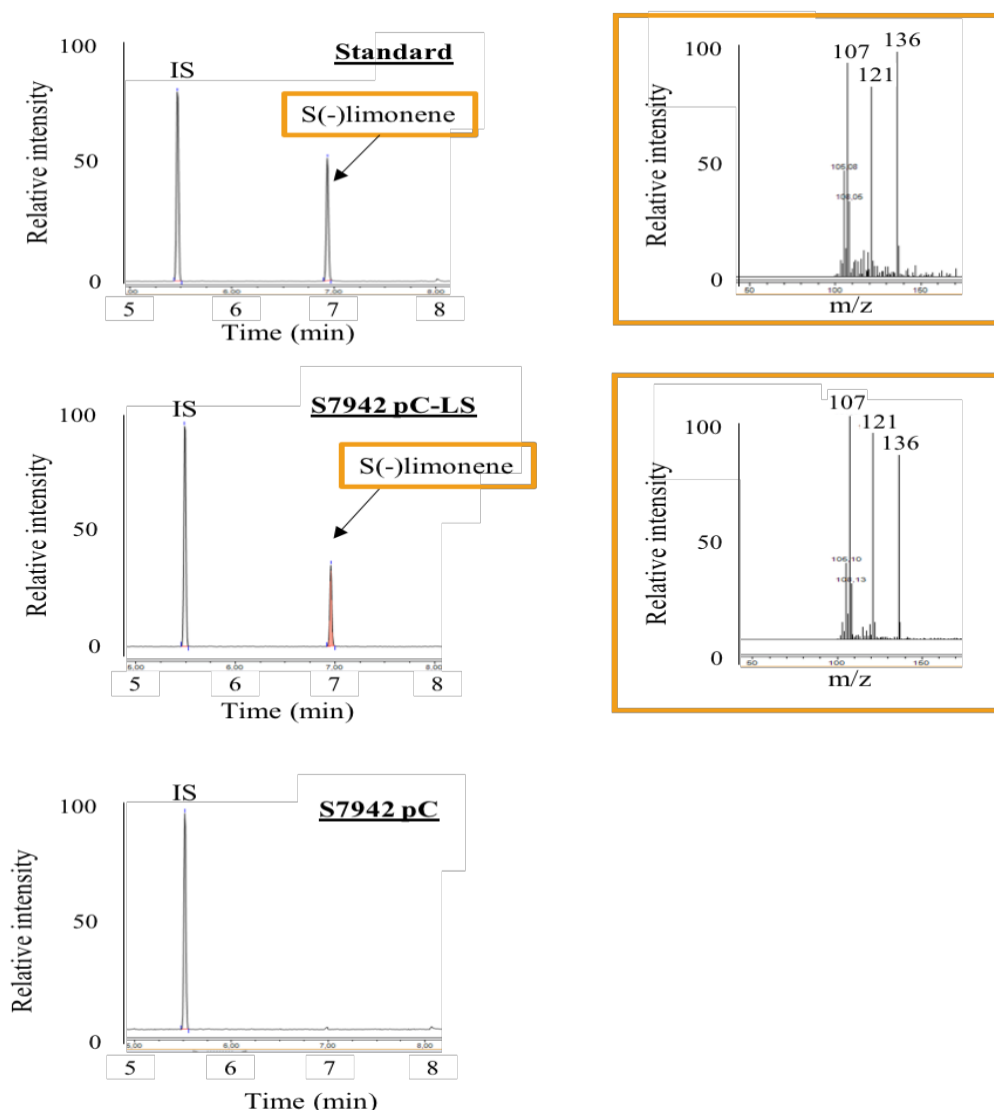

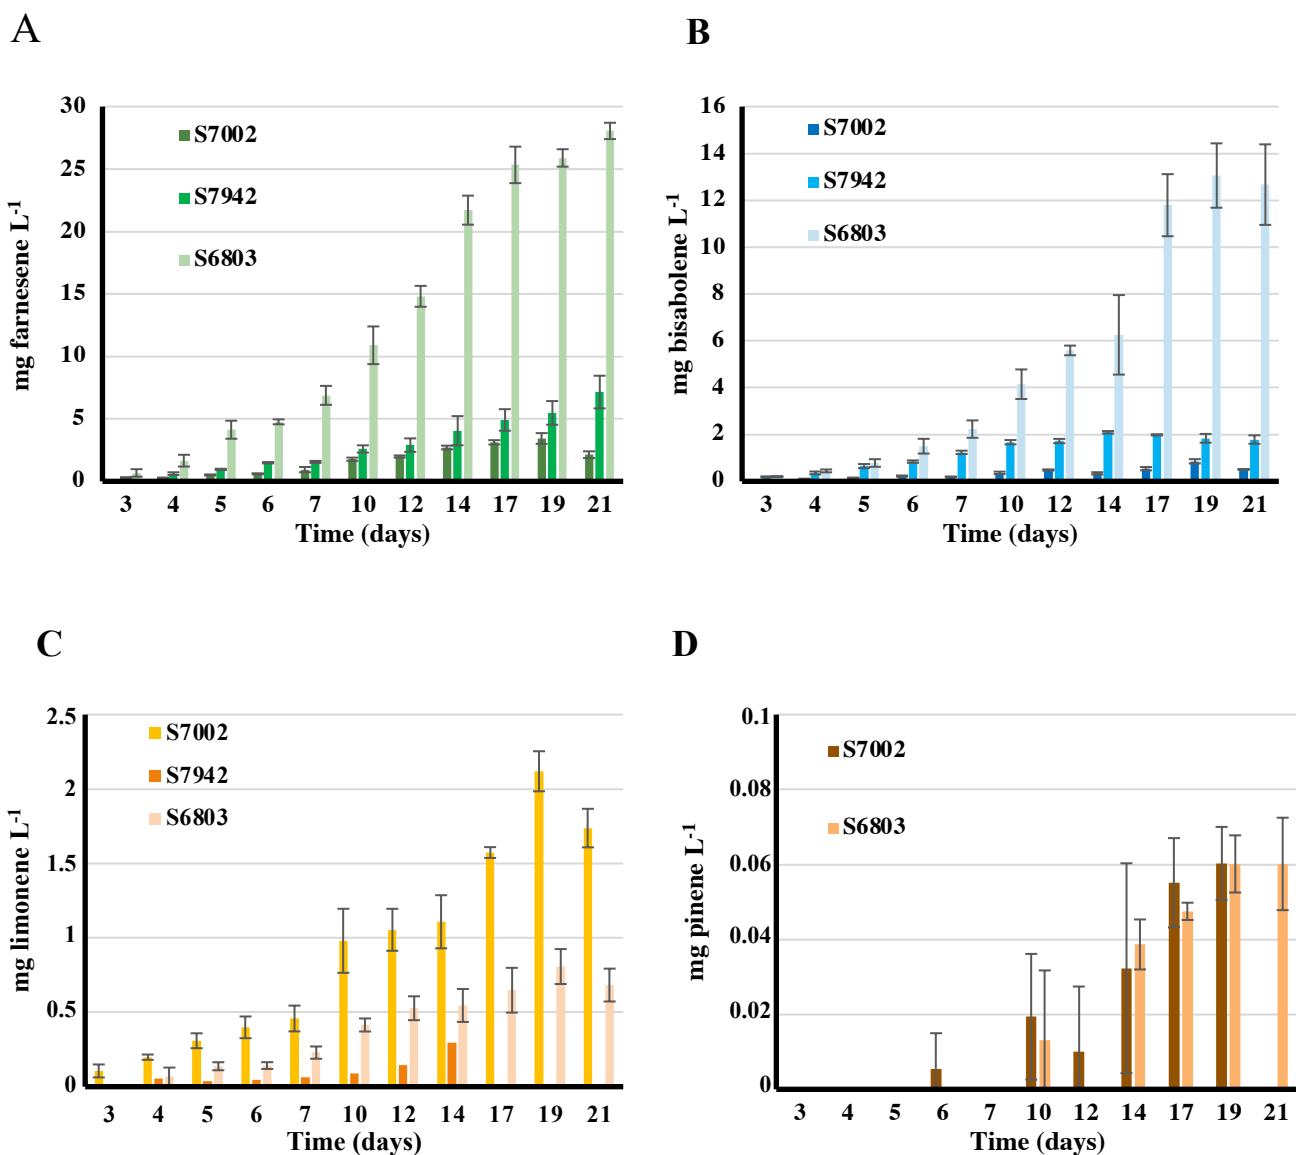

**Figure S5. Comparison of the photosynthetic production of terpenes by the *Synechococcus* PCC 7002, *Synechococcus* PCC 7949 and *Synechocystis* PCC 6803 strains we have engineered in this study (S7002 and S7942), or a previous one (S6803)**

Cells were grown under standard photoautotrophic conditions in the presence of a dodecane overlay (20% vol/vol) to assay the production of farnesene (A), Bisabolene (B), limonene (C) or Pinene (D) during 21 days. Error bars represent standard deviation from  $n \geq 2$  biological replicates.

The terpenes producing strains of S6803 have been described in Blanc-Garin *et al* 2022

Biotechnology for Biofuels and Bioproducts 15 <https://doi.org/10.1186/s13068-022-02211-0>.



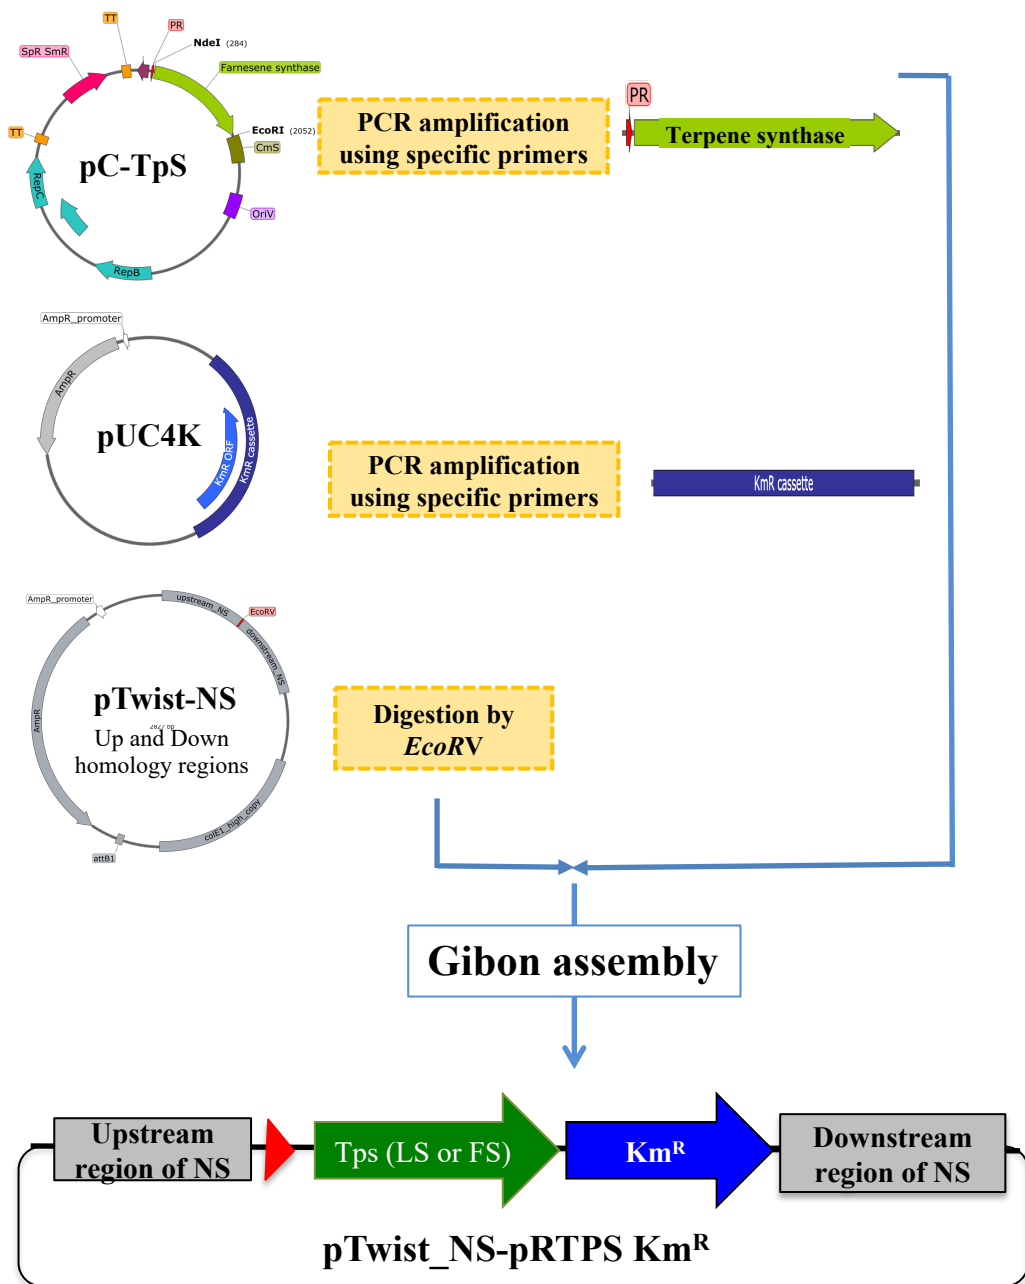

**Figure S6. Construction of the pR-TPS-Km<sup>R</sup> DNA cassette for targeted insertion of a terpene synthase genes (LS or FS) in the neutral chromosome sites of *Synechococcus* PCC 7002 (NS<sub>7002</sub>) or *Synechococcus* PCC 7942 (NSI<sub>7942</sub>)**

First, the **pR-TPS** gene (expression of the *terpene synthase* gene from the **pR** promoter) and the **Km<sup>R</sup>** marker were PCR amplified from the plasmids pCTPS and pUC4K, respectively (Table S1). Second, the pTwist\_NS plasmid was opened at its unique *EcoRV* restriction site flanked by the two chromosomal DNA regions surrounding the NS<sub>7002</sub> or NSI<sub>7942</sub> neutral sites (500 bp in length for NS<sub>7002</sub> and 300 bp for NSI<sub>7942</sub>). Third, all three DNA cassettes (**pR-TPS**, **Km<sup>R</sup>** and pTwist\_NS) were assembled by Gibson® cloning. The resulting pTwist\_NS<sub>7002</sub>-TPS-Km<sup>R</sup> and pTwist\_NS<sub>7942</sub>-TPS-Km<sup>R</sup> plasmids were transformed to S.7002 or S.7942 to insert the **pR-TPS\_Km<sup>R</sup>** cassette in the neutral chromosomal sites NS<sub>7002</sub> or NSI<sub>7942</sub>.

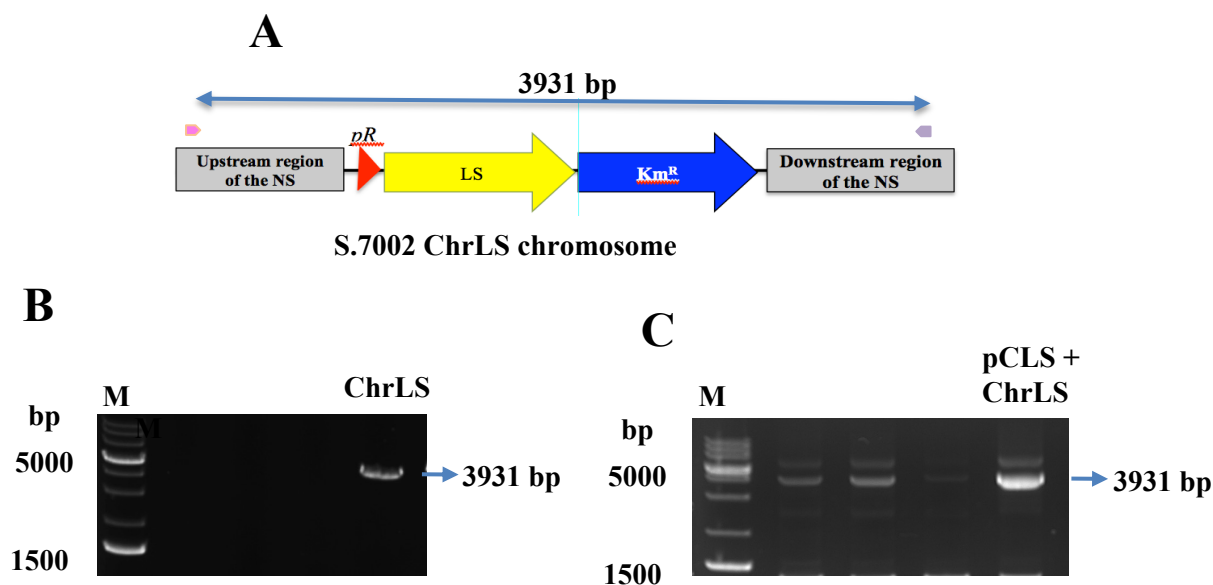

**Figure S7. PCR verification of the presence of the pR-LS-Km<sup>R</sup> cassette inserted inside the neutral chromosomal site (NS<sub>7002</sub>) of *Synechococcus* PCC 7002.**

**A)** Schematic representation of the pR-LS-Km<sup>R</sup> DNA cassette integrated in the NS<sub>7002</sub> chromosomal site of S.7002. Genes are represented by wide shapes colored in yellow (limonene synthase gene, LS), grey (NS<sub>7002</sub> flanking regions), blue (Km<sup>R</sup> marker) or red (*pR* promoter). PCR primers and the resulting 3931 bp DNA product are indicated by colored arrows.

**B)** Typical UV-light image of the agarose gel showing the 3931 bp PCR product of the ChrLS strain harboring the pR-LS-Km<sup>R</sup> DNA cassette in the NS<sub>7002</sub> neutral chromosome site of otherwise WT cells of S.7002. Size marker (M) = Genruler 1 kb Plus DNA Ladder (Thermofisher).

**C)** Typical 3931 bp PCR product of the pCLS+ChrLS strain harboring the pR-LS-Km<sup>R</sup> DNA cassette in the NS<sub>7002</sub> site of S.7002 cells propagating the pCLS plasmid. M = Genruler 1 kb Plus DNA Ladder (Thermofisher).

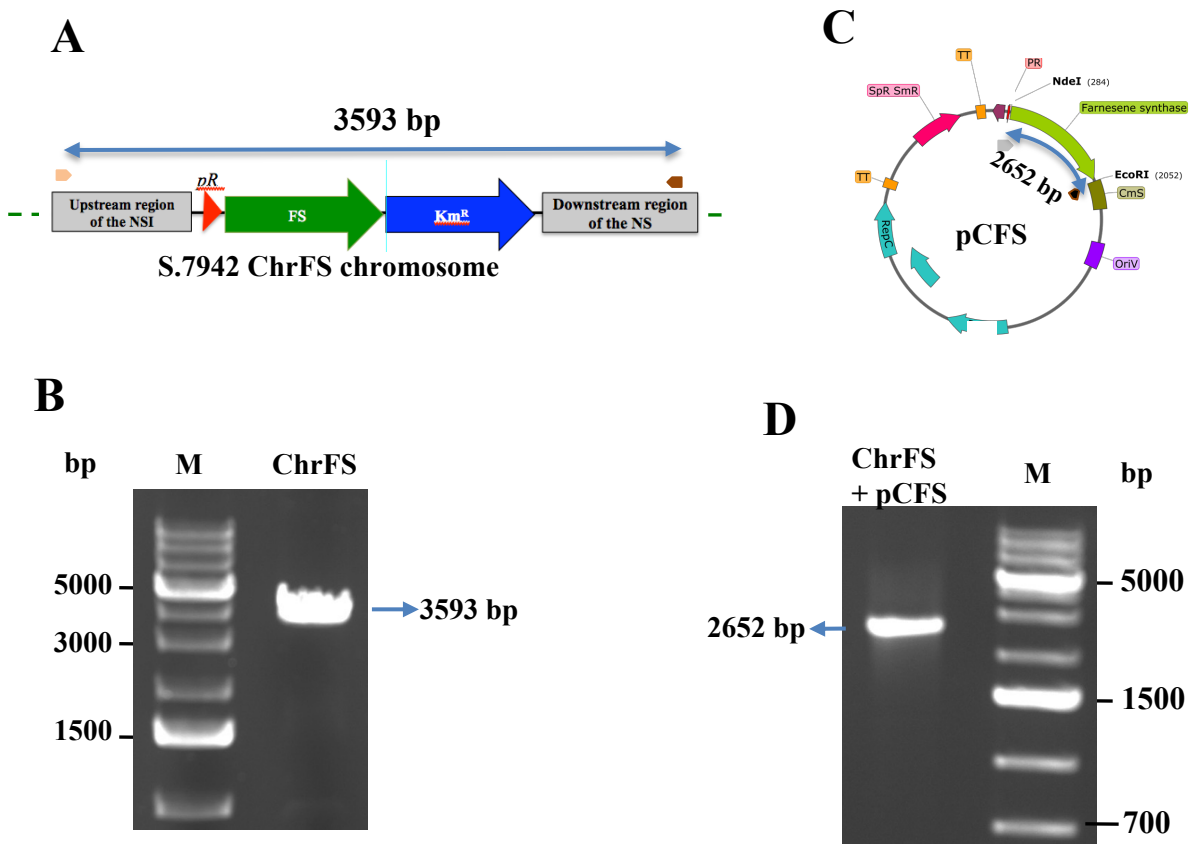

**Figure S8. PCR verification of the presence of the farnesene synthase gene propagated by either or both the pCFS plasmid or the NSI<sub>7942</sub> neutral chromosomal site of *Synechococcus* PCC 7942**

**A)** Schematic representation of the pR-FS-Km<sup>R</sup> DNA cassette integrated in the NSI<sub>7942</sub> chromosome site of S.7942. Genes are represented by wide shapes colored in green (farnesene synthase gene, FS), grey (NSI<sub>7942</sub> flanking regions), blue (Km<sup>R</sup> marker) or red (*pR* promoter). PCR primers and the resulting 3593 bp DNA product are indicated by colored arrows.

**B)** Typical UV-light image of the agarose gel showing the 3593 bp PCR product of the ChrFS strain harboring the pR-FS-Km<sup>R</sup> DNA cassette in the NSI<sub>7942</sub> chromosome site of otherwise WT cells of S.7942. Size marker (M) = Genruler 1 kb Plus DNA Ladder (Thermofisher).

**C)** Schematic representation of the pCFS plasmid showing the *pR* promoter and FS gene as the small red triangle and green arrows, respectively. PCR primers and the corresponding 2652 bp DNA product are indicated by colored arrows.

**D)** Typical agarose gel showing the 2652 bp PCR product of the pR-FS gene of pCFS replicating in the ChrFS strain generating the ChrFS+pCFS strain. Size marker (M) = Genruler 1 kb Plus DNA Ladder (Thermofisher).

**Table S1 – Characteristics of the bacterial strains and plasmids used in this study**

| Strain/Plasmid                                                                                                        | Relevant features                                                                                                                                                                                             | Reference                                   |
|-----------------------------------------------------------------------------------------------------------------------|---------------------------------------------------------------------------------------------------------------------------------------------------------------------------------------------------------------|---------------------------------------------|
| <i>Escherichia coli</i> CM404                                                                                         | <i>E. coli</i> strain harboring the self-transmissible plasmid pRK2013 enabling the conjugative transfer of RSF1010-derived pC plasmids into cyanobacteria                                                    | (Mermet-Bouvier and Chauvat, 1994)          |
| <i>Escherichia coli</i> TOP10                                                                                         | <i>E. coli</i> strain for cloning and conjugation                                                                                                                                                             | Invitrogen                                  |
| <i>Escherichia coli</i> NEB 10-beta                                                                                   | <i>E. coli</i> strain for cloning                                                                                                                                                                             | New England Biolabs                         |
| <i>Synechococcus</i> PCC 7002                                                                                         | Well studied, fast-growing unicellular and euryhaline cyanobacterium                                                                                                                                          | Pasteur Institute (Paris, France)           |
| <i>Synechococcus</i> PCC 7942                                                                                         | Well studied unicellular freshwater cyanobacterium                                                                                                                                                            | Pasteur Institute (Paris, France)           |
| <b>Plasmid cloning vectors</b>                                                                                        |                                                                                                                                                                                                               |                                             |
| pTwist                                                                                                                | Amp <sup>R</sup> plasmid vector                                                                                                                                                                               | Twist Biosciences                           |
| pUC4K                                                                                                                 | Source of the Km <sup>R</sup> marker with no transcription terminator                                                                                                                                         | Pharmacia                                   |
| pC                                                                                                                    | RSF1010-derived plasmid vector (Sp <sup>R</sup> /Sm <sup>R</sup> , Cm <sup>R</sup> ) harboring the strong <i>p<sub>R</sub></i> promoter for constitutive gene expression in <i>E. coli</i> and cyanobacteria  | (Veaudor et al., 2018)                      |
| <b>Replicative plasmids for strong constitutive expression of terpene synthase genes in cyanobacteria</b>             |                                                                                                                                                                                                               |                                             |
| pCLS                                                                                                                  | pC derived plasmid (Sp <sup>R</sup> /Sm <sup>R</sup> , Cm <sup>S</sup> ) harboring the <i>Mentha spicata</i> 4S-limonene synthase gene (LS) cloned between the <i>NdeI</i> and <i>EcoRI</i> restriction sites | (Chenebault et al., 2020) & This study      |
| pCPS                                                                                                                  | pC derivative (Sp <sup>R</sup> /Sm <sup>R</sup> , Cm <sup>S</sup> ) harboring the <i>Pinus taeda</i> pinene synthase gene (PS) cloned between <i>NdeI</i> and <i>EcoRI</i>                                    | (Blanc-Garin et al., 2022) & This study     |
| pCBS                                                                                                                  | pC derivative (Sp <sup>R</sup> /Sm <sup>R</sup> , Cm <sup>S</sup> ) carrying the <i>Abies grandis</i> bisabolene synthase gene (BS) cloned between <i>NdeI</i> and <i>EcoRI</i>                               | (Blanc-Garin et al., 2022) & This study     |
| pCFS                                                                                                                  | pC derivative (Sp <sup>R</sup> /Sm <sup>R</sup> , Cm <sup>S</sup> ) carrying the <i>Picea abies</i> farnesene synthase gene (FS) cloned between <i>NdeI</i> and <i>EcoRI</i>                                  | (Blanc-Garin et al., 2022) & This study     |
| <b>Plasmids for gene cloning into the NS<sub>7002</sub> neutral chromosomal site of <i>Synechococcus</i> PCC 7002</b> |                                                                                                                                                                                                               |                                             |
| pTwist_NS-S7002                                                                                                       | pTwist harboring an <i>EcoRV</i> restriction site flanked by two 500 bp chromosomal DNA regions for cloning genes in the NS <sub>7002</sub> neutral chromosome site of <i>Synechococcus</i> PCC 7002          | This study (Twist Bioscience) and Figure S7 |
| pTwist_NS-S7002p <sub>R</sub> LSKm <sup>R</sup>                                                                       | pTwist_NS-S7002 harboring the Km <sup>R</sup> DNA cassette expressing the <i>Mentha spicata</i> 4S-limonene synthase from the strong <i>p<sub>R</sub></i> promoter                                            | This study; Fig.S7                          |
| <b>Plasmids for gene cloning into the NS<sub>7942</sub> neutral chromosomal site of <i>Synechococcus</i> PCC 7942</b> |                                                                                                                                                                                                               |                                             |
| pTwist_NSI-S7942                                                                                                      | pTwist harboring an <i>SmaI</i> restriction site flanked by two 300 bp regions chromosomal DNA regions for cloning genes in the NSI <sub>7942</sub> neutral chromosome site of <i>Synechococcus</i> PCC 7942  | This study (Twist Bioscience) Figure S7     |
| pTwist_NSI-S7942-p <sub>R</sub> FSKm <sup>R</sup>                                                                     | pTwist_NS-S7942 harboring the Km <sup>R</sup> DNA cassette expressing the <i>Picea abies</i> farnesene synthase gene (FS) from the strong <i>p<sub>R</sub></i> promoter                                       | This study; Figure S8                       |

References:

- Mermet-Bouvier, P.; Chauvat, F.. *Curr. Microbiol.* **1994**, *28*, 145–148, doi:10.1007/BF01571055.
- Chenebault, C. et al. *Front. Microbiol.* **2020**, *11*, 586–601, doi:10.3389/fmicb.2020.586601.
- Blanc-Garin, V.; Chenebault, C. et al. .. *Biotechnol. Biofuels* **2022**, *15*, doi:10.1186/s13068-022-02211-0.

**Table S2 – Characteristics of the primers used in this study**

| Name                                                                                                                                            | Sequence (5'-3')                         | Purpose                                                                                                                                                                                                                           |
|-------------------------------------------------------------------------------------------------------------------------------------------------|------------------------------------------|-----------------------------------------------------------------------------------------------------------------------------------------------------------------------------------------------------------------------------------|
| pC and pC derivatives                                                                                                                           |                                          |                                                                                                                                                                                                                                   |
| pC_Fw                                                                                                                                           | TCATAAATTGCTTTAAGGCG                     | Forward (Fw) and reverse (Rv) primers for PCR amplification and DNA sequencing of the terpene synthase genes cloned in pC                                                                                                         |
| pC_Rv                                                                                                                                           | GTGTAACAAGGGTGAACAC                      |                                                                                                                                                                                                                                   |
| pTwist plasmids                                                                                                                                 |                                          |                                                                                                                                                                                                                                   |
| M13_Fw                                                                                                                                          | GTAAAACGACGGCCAGT                        | DNA sequencing of inserts cloned in pTwist                                                                                                                                                                                        |
| M13_Rv                                                                                                                                          | CAGGAAACAGCTATGAC                        |                                                                                                                                                                                                                                   |
| Pinene synthase encoding gene                                                                                                                   |                                          |                                                                                                                                                                                                                                   |
| PS_Fw1                                                                                                                                          | GCGAGAAGTTGCTAGAATTGGC                   | Forward and reverse primers for DNA sequencing of PS genes                                                                                                                                                                        |
| PS_Rv1                                                                                                                                          | TAACCGCAAAATGGCGCAA                      |                                                                                                                                                                                                                                   |
| PS_Rv2                                                                                                                                          | ACCAACGAGACAGAGACTGC                     |                                                                                                                                                                                                                                   |
| Limonene synthase encoding gene                                                                                                                 |                                          |                                                                                                                                                                                                                                   |
| LS_Rv3                                                                                                                                          | GATAGGCCCATGCGTTGAAGAT                   | Forward and reverse primers for DNA sequencing of LS genes                                                                                                                                                                        |
| LS_Fw3                                                                                                                                          | TGTCCGATTATAATGCCTCCG                    |                                                                                                                                                                                                                                   |
| Bisabolene synthase encoding gene                                                                                                               |                                          |                                                                                                                                                                                                                                   |
| BS_Fw2                                                                                                                                          | TGAGACCGACCAAGATAGC                      | Forward and reverse primers for DNA sequencing of BS genes                                                                                                                                                                        |
| BS_Fw3                                                                                                                                          | TAGGCATTGGAACGAGCG                       |                                                                                                                                                                                                                                   |
| BS_Fw4                                                                                                                                          | TATGACACCTACGGTACC                       |                                                                                                                                                                                                                                   |
| BS_Rv5                                                                                                                                          | CAAGAACTCAAGGCACTTC                      |                                                                                                                                                                                                                                   |
| Construction of the NS <sub>7002</sub> ::pR-LS-Km <sup>R</sup> and NSI <sub>7942</sub> ::pR-FS-Km <sup>R</sup> DNA cassettes by GIBSON assembly |                                          |                                                                                                                                                                                                                                   |
| Pr-fwd-S7942                                                                                                                                    | gacgagcagggactcgaccTTGACTATTTTACCTCTGGC  | Forward primer for PCR amplification of the <i>pR</i> -FS DNA cassette of the pCFS plasmid. It overlaps the upstream region of the NSI <sub>7942</sub> chromosomal site (in 5') and <i>pR</i> (in 3')                             |
| Pr-fwd-S7002                                                                                                                                    | acttaaaaactgagtaagatTTGACTATTTTACCTCTGGC | Forward primer for PCR amplification of the <i>pR</i> -LS and <i>pR</i> -FS DNA cassettes of the pCLS and pCFS plasmids. It overlaps the upstream region of the NS <sub>7002</sub> chromosomal site (in 5') and <i>pR</i> (in 3') |
| Km-rev-S7002                                                                                                                                    | aaaacgagataaaataggatGACCTGCAGGGGGGGGGG   | Reverse primer for PCR amplification of the Km <sup>R</sup> gene of pUC4K. It overlaps the downstream region of NS <sub>7002</sub> (in 5') and the end of Km <sup>R</sup> (in 3')                                                 |

|                                                                                                                         |                                     |                                                                                                                                                                                                               |
|-------------------------------------------------------------------------------------------------------------------------|-------------------------------------|---------------------------------------------------------------------------------------------------------------------------------------------------------------------------------------------------------------|
| Pr-FS-Rv                                                                                                                | cctgcaggtcTTACATGGGAACGGGTTC        | Reverse primer for PCR amplification of the <i>pR</i> -FS cassette of pCFS. It overlaps the end of the FS gene (in 3') and the beginning of the Km <sup>R</sup> marker (in 5')                                |
| Pr-LS-Rv                                                                                                                | cctgcaggtcTTAAGCAAAGGGCTCAAAC       | Reverse primer for PCR amplification of the <i>pR</i> -LS cassette of pCLS. It overlaps the end of the LS gene (in 3') and the beginning of Km <sup>R</sup> (in 5')                                           |
| KM-FS-Fwd                                                                                                               | tcccatgtaaGACCTGCAGGGGGGGGGG        | Forward primer for PCR amplification of the Km <sup>R</sup> gene of pUC4K. It overlaps the end of FS (in 3') and the beginning of Km <sup>R</sup> (in 5')                                                     |
| KM-LS-Fwd                                                                                                               | cttgcttaaGACCTGCAGGGGGGGGGG         | Forward primer for PCR amplification of the Km <sup>R</sup> gene of pUC4K. It overlaps the end of LS (in 3') and the beginning of Km <sup>R</sup> (in 5')                                                     |
| KM-rev-S7942                                                                                                            | ttctgtccagaagccccGACCTGCAGGGGGGGGGG | Reverse primer for PCR amplification of the Km <sup>R</sup> gene of pUC4K. It overlaps the downstream region of NSI neutral site (in 5') and the end of Km <sup>R</sup> (in 3')                               |
| <b>Plasmids and <i>Synechococcus</i> PCC 7002 and <i>Synechococcus</i> PCC 7942 strains harboring the DNA cassettes</b> |                                     |                                                                                                                                                                                                               |
| NS_S7002_Fw                                                                                                             | ATTGGGGAATAGTGCAC                   | PCR amplification of the <i>pR</i> -LS-Km <sup>R</sup> and <i>pR</i> -FS-Km <sup>R</sup> DNA cassette inserted into the NS <sub>7002</sub> chromosomal site of S.7002, and analysis of chromosome segregation |
| NS_S7002_Rv                                                                                                             | ATGTGCTTTCAGCAAAAGTT                |                                                                                                                                                                                                               |
| NS7942_Fwd                                                                                                              | CACAGACATCTAGATAGTCCTCAA            | PCR amplification and DNA sequencing of the FS expression cassette ( <i>pR</i> -FS-Km <sup>R</sup> ) cloned into the NSI <sub>7942</sub> chromosomal site of S.7942, and analysis of chromosome segregation.  |
| NS7942_Rv                                                                                                               | CTGAAGCGGACATTGCTA                  |                                                                                                                                                                                                               |
